# Supplementary material for: Esketamine versus placebo on time to remission in major depressive disorder with acute suicidality
Source: PubMed Central journal article supplement (PMC10416356; doi:10.1186/s12888-023-05017-y), 2023-08-11
Supplement: 12888_2023_5017_MOESM1_ESM.pdf [file 12888_2023_5017_MOESM1_ESM.pdf]

## **Additional File 1. List of Institutional Review Boards and Independent Ethics Committees**

### **ARGENTINA\***

Comité de Ética e Investigación del Sanatorio, Cordoba  
Comite de Ética del Instituto Medico Platense CEDIMP, Buenos Aires  
Comité de Ética en Investigación Clínica Privada de Salud Mental Santa Teresa de Avila, Buenos Aires  
Comité de Ética de CER Investigaciones Clínicas – CECIC, Buenos Aires  
Comité de Ética en Investigación Burzaco Comité de Etica en Investigación Burzaco, Buenos Aires  
Comité de Ética en Investigaciones FLENI, Buenos Aires

### **AUSTRIA**

Ethikkkommission der Med. Universität Wien, und des Allgemeinen Krhs. der Stadt Wien, Wien  
Kepler Universitätsklinikum Ethikkommission des Landes Oberösterreich, Linz

### **BELGIUM\***

Ethisch Comité g UZ Gent, Gent  
O.L.V. Ziekenhuis IRB, Aalst  
Toetsingscommissie Ethiek GGZ Broeders van liefde, Bierbeek

### **BRAZIL\***

National Committee of Ethics in Research (CONEP), Brasilia  
Comite de Etica em Pesquisa da UFMG – COEP, Belo Horizonte  
Comitê de Ética em Pesquisa do Investiga - Instituto De Pesquisas, Campinas  
Comitê de Ética em Pesquisa da Faculdade de Medicina do ABC, Santo Andre  
Comite de Ética em Pesquisa do Hospital Universitário, Salvador & Fortaleza  
Comitê de Ética em Pesquisa do Hospital São Carlos, Fortaleza, Ceará  
Comissao de Etica para analise de projetos de pesquisa - CAPPesq-HCFMUSP, San Paulo

### **BULGARIA**

Ethics Committee for Clinical Trials

### **CANADA**

St. Michael's Hospital Research Ethics Board, Toronto, Ontario

### **CZECH REPUBLIC\***

Eticka komise Ustredni vojenske nemocnice Praha, Prague  
Eticka komise IKEM a Thomayerovy nemocnice, Prague  
Fakultni nemocnice Brno IRB-EC, Brno

### **ESTONIA**

Tallinn Medical Research Ethics Committee

**FRANCE**

CPP Sud-Ouest et Outre-Mer III, Service de Pharmacologie Clinique, Leon

**GERMANY**

Ethikkommission der Medizinischen Fakultät der Albert-Ludwigs-Universität  
Freiburg

Ethik-Kommission des Fachbereichs Medizin der Johann Wolfgang Goethe-  
Universität

Landesamt für Gesundheit Und Soziales Berlin Geschäftsstelle der Ethik-  
Kommission des Landes Berlin

**HUNGARY**

Central Ethics Committee Medical Research Council Ethics Committee for Clinical  
Pharmacology

**KOREA**

Chonnam National University Hospital IRB

Samsung Medical Center IRB

Kyung Hee University Medical Center IRB

Seoul National University Hospital IRB

Korea University Ansan Hospital IRB

**LITHUANIA**

Lithuanian Bioethics Committee, Vilnius

**MALAYSIA**

Medical Research and Ethics Committee, Kompleks Institut Kesihatan Negara

Medical Research Ethics Committee, University Malaya Medical Centre

**POLAND**

Niezależna Komisja Bioetyczna do Spraw Badan Naukowych przy Gdanskim  
Uniwersytecie Medycznym, Gdansk

**SOUTH AFRICA**

Pharma Ethics

**SPAIN**

CEIC Hospital Universitari Vall d Hebron

Hospital de Navarra - Ceic de Navarra, Pamplona

**TAIWAN**

Institutional Review Board of Tri-Service General Hospital

Chung Shan Medical University Hospital IRB

Taipei Medical University Joint Institutional Review Board

Institutional Review Board, Taipei Veterans General Hospital

## **TURKEY**

Uludag University Medical Faculty Clinical Research Ethics Committee, Bursa

## **UNITED STATES**

Biomedical Research Alliance of New York IRB (Lake Success, NY)

Chesapeake IRB (Columbia, MD)

John Hopkins Medicine IRB (Baltimore, MD)

New York State Psychiatric Institutional Review Board (New York, NY)

Office of Research Integrity (Charleston, SC)

Rush University Medical Center Institutional Review Board (Chicago, IL)

Sharp HealthCare Institutional Review Board (San Diego, CA)

Springfield Committee for Research Involving Human Subjects (SCRIHS)  
(Springfield, IL)

Sterling Institutional Review Board (Atlanta, GA)

UCSD Human Subjects Research Protection Program (La Jolla, CA)

University at Buffalo Institutional Review Board (Buffalo, NY)

University of Connecticut School of Medicine IRB (Farmington, CT)

University of Louisville, Medical Center Institutional Review Board (Louisville, KY)

University of North Carolina at Chapel Hill - Office of Research Ethics, Chapel Hill,  
NC

UT Southwestern Medical Center Institutional Review Board (Dallas, TX)

Western Institutional Review Board (Puyallup, WA)

\* Two or more Independent Ethics Committees approved the study protocol/amendments at sites in Argentina, Belgium, Brazil, and Czech Republic.
